# Supplementary material for: FOLFIRINOX or gemcitabine/nab‐paclitaxel in advanced pancreatic adenocarcinoma: A novel validated prognostic score to facilitate treatment decision‐making in real‐world
Source: PubMed Central journal article supplement — Int J Cancer. 2022 Sep 22;152(3):458–69. doi: 10.1002/ijc.34271 (PMC10087956; doi:10.1002/ijc.34271), 2022-09-22
Supplement: IJC-152-458-s001.pdf [file IJC-152-458-s001.pdf]

**Supplementary Material**

**FOLFIRINOX or gemcitabine/nab-paclitaxel in advanced pancreatic adenocarcinoma –  
A novel validated prognostic score to facilitate treatment decision-making in real-  
world**

Norbert Marschner, MD; Susanna Hegewisch-Becker, Prof, MD; Marcel Reiser, PD, MD; Eyck von der Heyde, MD; Mathias Bertram, MD; Stephan H. Hollerbach, Prof, MD; Stephan Kreher, PD, MD; Thomas Wolf, MD; Adrian Binninger, MSc; Marco Chiabudini, PhD; Anja Kaiser-Osterhues, PhD; Martina Jänicke, PhD and the TPK-Group (Tumour Registry Pancreatic Cancer)

**Table of contents**

**Table S1. Patient and tumour characteristics for learning and validation sample.....2**

**Table S2: The Pancreatic Cancer Score (PCS) / Real-World.....3**

**Table S3. Patient and tumour characteristics for learning and validation sample according to risk groups.4**

**Table S1. Patient and tumour characteristics for learning and validation sample**

| Characteristic at start of first-line treatment | Learning sample<br>n= 1,027 | Validation sample<br>n= 513 |
|-------------------------------------------------|-----------------------------|-----------------------------|
| Age [yrs], mean ( $\pm$ StD)                    | 69.2 ( $\pm$ 9.60)          | 68.8 ( $\pm$ 9.52)          |
| Sex                                             |                             |                             |
| Female                                          | 477 (46.4%)                 | 230 (44.8%)                 |
| Male                                            | 550 (53.6%)                 | 283 (55.2%)                 |
| BMI                                             |                             |                             |
| <24                                             | 469 (45.7%)                 | 247 (48.1%)                 |
| $\geq$ 24                                       | 558 (54.3%)                 | 266 (51.9%)                 |
| ECOG performance status                         |                             |                             |
| 0                                               | 367 (35.7%)                 | 166 (32.4%)                 |
| $\geq$ 1                                        | 660 (64.3%)                 | 347 (67.6%)                 |
| CCI <sup>a</sup>                                |                             |                             |
| 0/unknown                                       | 701 (68.3%)                 | 362 (70.6%)                 |
| $\geq$ 1                                        | 326 (31.7%)                 | 151 (29.4%)                 |
| Localisation of tumour at diagnosis             |                             |                             |
| Pancreas body/tail/unknown                      | 491 (47.8%)                 | 256 (49.9%)                 |
| Pancreas head                                   | 536 (52.2%)                 | 257 (50.1%)                 |
| Tumour staging at diagnosis                     |                             |                             |
| I-III                                           | 127 (12.4%)                 | 47 (9.2%)                   |
| IV/unknown                                      | 900 (87.6%)                 | 466 (90.8%)                 |
| Metastases                                      |                             |                             |
| No/unknown                                      | 158 (15.4%)                 | 89 (17.3%)                  |
| Yes                                             | 869 (84.6%)                 | 424 (82.7%)                 |
| Liver metastases                                |                             |                             |
| No/unknown                                      | 462 (45.0%)                 | 230 (44.8%)                 |
| Yes                                             | 565 (55.0%)                 | 283 (55.2%)                 |
| Bilirubin                                       |                             |                             |
| $\leq$ 1.5x ULN/unknown                         | 907 (88.3%)                 | 443 (86.4%)                 |
| >1.5x ULN                                       | 120 (11.7%)                 | 70 (13.6%)                  |
| Leukocytes above ULN                            |                             |                             |
| No                                              | 755 (73.5%)                 | 381 (74.3%)                 |
| Yes/unknown                                     | 272 (26.5%)                 | 132 (25.7%)                 |
| Neutrophil-to-lymphocyte ratio                  |                             |                             |
| <4/unknown                                      | 647 (63.0%)                 | 304 (59.3%)                 |
| $\geq$ 4                                        | 380 (37.0%)                 | 209 (40.7%)                 |

Data are number (%), unless indicated otherwise.

<sup>a</sup> Charlson comorbidity index (CCI) according to Quan et al., 2011.

**Abbreviations:** BMI, body mass index; CCI, Charlson comorbidity index; ECOG, Eastern Cooperative Oncology Group; ULN, upper limit of the norm.

**Table S2: The Pancreatic Cancer Score (PCS) / Real-World**

Patient's ID:

Date:

| <b>Prognostic factor</b>                                         | <b>yes</b> | <b>no</b> |
|------------------------------------------------------------------|------------|-----------|
| Female sex                                                       |            |           |
| Diagnosed with synchronous metastasis (M1/stage IV at diagnosis) |            |           |
| <i>At start of first-line treatment:</i>                         |            |           |
| BMI* $\geq 24$                                                   |            |           |
| ECOG performance status** $\geq 1$                               |            |           |
| CCI*** $\geq 1$                                                  |            |           |
| Liver metastases present                                         |            |           |
| Bilirubin $>1.5 \times$ ULN                                      |            |           |
| Leukocytes $>ULN$                                                |            |           |
| NLR $\geq 4$                                                     |            |           |
| <b><i>SUM of existent prognostic factors</i></b>                 |            |           |

0-3 risk factors: → **favourable risk**

4-5 risk factors: → **intermediate risk**

6-9 risk factors: → **poor risk**

\* Body mass index (BMI) = patient's weight [kg] / square of height [m<sup>2</sup>]

\*\* ECOG performance status 0 = fully active, able to carry on all pre-disease performance without restrictions; 1 = restricted in physical strenuous activity but ambulatory and able to carry out work of light or sedentary nature; 2+ = increasingly restricted in ability to work and selfcare

\*\*\* Presence of (at least) one of the following comorbidities: chronic pulmonary disease, congestive heart failure, collagenosis / rheumatologic disease, dementia, diabetes with end organ damage, hemiplegia / paraplegia, HIV / AIDS, liver disease, moderator to severe renal disease, secondary tumours

**Abbreviations:** BMI, Body mass index; CCI, Charlson comorbidity index nach Quan et al. 2011; ECOG, Eastern Cooperative Oncology Group; NLR, neutrophil-to-lymphocyte ratio; ULN, upper limit of the norm

**Table S3. Patient and tumour characteristics for learning and validation sample according to risk groups**

| Characteristic at start of first-line treatment | Learning sample<br>n= 1,027 |                     |                | Validation sample<br>n= 513 |                     |               |
|-------------------------------------------------|-----------------------------|---------------------|----------------|-----------------------------|---------------------|---------------|
|                                                 | Favourable<br>n= 324        | Intermed.<br>n= 540 | Poor<br>n= 163 | Favourable<br>n= 169        | Intermed.<br>n= 256 | Poor<br>n= 88 |
| Age [y], mean (±StD)                            | 67.9 (10.08)                | 69.5 (9.44)         | 70.6 (8.90)    | 68.9 (9.83)                 | 68.7 (9.84)         | 69.1 (7.90)   |
| Sex                                             |                             |                     |                |                             |                     |               |
| Female                                          | 116 (35.8%)                 | 259 (48.0%)         | 102 (62.6%)    | 58 (34.3%)                  | 118 (46.1%)         | 54 (61.4%)    |
| Male                                            | 208 (64.2%)                 | 281 (52.0%)         | 61 (37.4%)     | 111 (65.7%)                 | 138 (53.9%)         | 34 (38.6%)    |
| BMI                                             |                             |                     |                |                             |                     |               |
| <24                                             | 219 (67.6%)                 | 222 (41.1%)         | 28 (17.2%)     | 112 (66.3%)                 | 115 (44.9%)         | 20 (22.7%)    |
| ≥24/unknown                                     | 105 (32.4%)                 | 318 (58.9%)         | 135 (82.8%)    | 57 (33.7%)                  | 141 (55.1%)         | 68 (77.3%)    |
| ECOG performance status                         |                             |                     |                |                             |                     |               |
| ECOG 0                                          | 176 (54.3%)                 | 167 (30.9%)         | 24 (14.7%)     | 90 (53.3%)                  | 70 (27.3%)          | 6 (6.8%)      |
| ECOG ≥1                                         | 148 (45.7%)                 | 373 (69.1%)         | 139 (85.3%)    | 79 (46.7%)                  | 186 (72.7%)         | 82 (93.2%)    |
| CCI <sup>a</sup>                                |                             |                     |                |                             |                     |               |
| 0/unknown                                       | 271 (83.6%)                 | 376 (69.6%)         | 54 (33.1%)     | 148 (87.6%)                 | 173 (67.6%)         | 41 (46.6%)    |
| ≥1                                              | 53 (16.4%)                  | 164 (30.4%)         | 109 (66.9%)    | 21 (12.4%)                  | 83 (32.4%)          | 47 (53.4%)    |
| Localisation of tumour <sup>b</sup>             |                             |                     |                |                             |                     |               |
| Pancreas body/tail/unknown                      | 140 (43.2%)                 | 268 (49.6%)         | 83 (50.9%)     | 84 (49.7%)                  | 133 (52.0%)         | 39 (44.3%)    |
| Pancreas head                                   | 184 (56.8%)                 | 272 (50.4%)         | 80 (49.1%)     | 85 (50.3%)                  | 123 (48.0%)         | 49 (55.7%)    |
| Tumour staging <sup>b</sup>                     |                             |                     |                |                             |                     |               |
| I-III                                           | 96 (29.6%)                  | 28 (5.2%)           | 3 (1.8%)       | 34 (20.1%)                  | 12 (4.7%)           | 1 (1.1%)      |
| IV/unknown                                      | 228 (70.4%)                 | 512 (94.8%)         | 160 (98.2%)    | 135 (79.9%)                 | 244 (95.3%)         | 87 (98.9%)    |
| Metastases                                      |                             |                     |                |                             |                     |               |
| No/unknown                                      | 87 (26.9%)                  | 58 (10.7%)          | 13 (8.0%)      | 51 (30.2%)                  | 33 (12.9%)          | 5 (5.7%)      |
| Yes                                             | 237 (73.1%)                 | 482 (89.3%)         | 150 (92.0%)    | 118 (69.8%)                 | 223 (87.1%)         | 83 (94.3%)    |
| Liver metastases                                |                             |                     |                |                             |                     |               |
| No/unknown                                      | 240 (74.1%)                 | 193 (35.7%)         | 29 (17.8%)     | 124 (73.4%)                 | 93 (36.3%)          | 13 (14.8%)    |
| Yes                                             | 84 (25.9%)                  | 347 (64.3%)         | 134 (82.2%)    | 45 (26.6%)                  | 163 (63.7%)         | 75 (85.2%)    |
| Bilirubin                                       |                             |                     |                |                             |                     |               |
| ≤ 1.5x ULN/unknown                              | 303 (93.5%)                 | 483 (89.4%)         | 121 (74.2%)    | 162 (95.9%)                 | 226 (88.3%)         | 55 (62.5%)    |
| >1.5x ULN                                       | 21 (6.5%)                   | 57 (10.6%)          | 42 (25.8%)     | 7 (4.1%)                    | 30 (11.7%)          | 33 (37.5%)    |
| Leukocytes above ULN                            |                             |                     |                |                             |                     |               |
| No                                              | 294 (90.7%)                 | 397 (73.5%)         | 64 (39.3%)     | 155 (91.7%)                 | 190 (74.2%)         | 36 (40.9%)    |
| Yes/unknown                                     | 30 (9.3%)                   | 143 (26.5%)         | 99 (60.7%)     | 14 (8.3%)                   | 66 (25.8%)          | 52 (59.1%)    |
| Neutrophil-to-lymphocyte ratio                  |                             |                     |                |                             |                     |               |
| <4/unknown                                      | 273 (84.3%)                 | 318 (58.9%)         | 56 (34.4%)     | 148 (87.6%)                 | 136 (53.1%)         | 20 (22.7%)    |
| ≥4                                              | 51 (15.7%)                  | 222 (41.1%)         | 107 (65.6%)    | 21 (12.4%)                  | 120 (46.9%)         | 68 (77.3%)    |

Data are number (%), unless indicated otherwise.

<sup>a</sup> Charlson comorbidity index (CCI) according to Quan et al., 2011;

<sup>b</sup> at diagnosis.

**Abbreviations:** BMI, body mass index; CCI, Charlson comorbidity index; ECOG, Eastern Cooperative Oncology Group; Intermed., intermediate risk; ULN, upper limit of the norm.
